# Supplementary material
Source: Springer Nature journal article supplement (https://www.springermedizin.de/resource/supplementary/12894_2014_385_MOESM2_ESM.pdf/9513670)

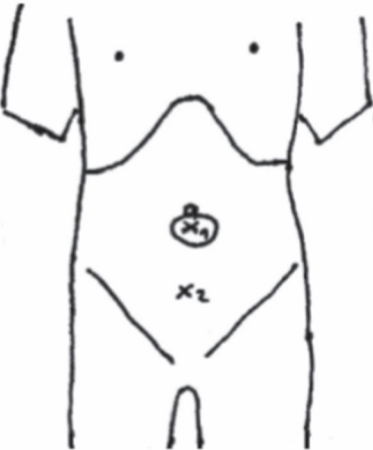

x1: X-Cone single port

x2: 3 mm trocar

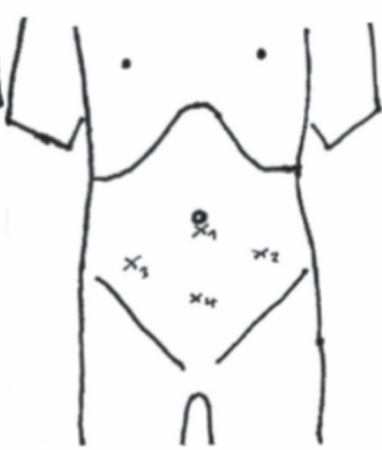

x1/x4: 10 mm trocars

x2/x3: 5 mm trocars

Supplement: MOESM2 [file 9513670]
